# 1 *Geobacter sulfurreducens*' unique metabolism results in 2 cells with a high iron and lipid content

3

4 Ethan Howley<sup>1,3</sup>, Dongwon Ki<sup>1,4</sup>, Rosa Krajmalnik-Brown<sup>1,3</sup>, César I. Torres<sup>1,2</sup>

5 <sup>1</sup> Biodesign Swette Center for Environmental Biotechnology, Arizona State University, USA

6 <sup>2</sup> School for Engineering of Matter Transport and Energy, Arizona State University, USA

7 <sup>3</sup> School for Sustainable Engineering and the Built Environment, Arizona State University, USA

8 <sup>4</sup> Division of Living and the Built Environment Research, Seoul Institute of Technology, South

9 Korea

10

11

## 12 **Abstract**

13 *Geobacter sulfurreducens* is a ubiquitous iron reducing bacterium in soils, and in engineered  
14 systems it can respire an electrode to produce measurable electric current. Its unique metabolism,  
15 heavily dependent on an extensive network of cytochromes, requires a unique cell composition.  
16 In this work we used metallomics, cell fraction and elemental analyses, and transcriptomics to  
17 study and analyze the cell composition of *G. sulfurreducens*. Elemental composition studies  
18 (C,H,O,N, ash content) showed a high C:O and H:O ratios of approximately 1.7:1 and 0.25:1,  
19 indicative of more reduced cell composition that is consistent with a high lipid content. Our  
20 study shows that *G. sulfurreducens* cells have a large amount of iron ( $2 \pm 0.2 \mu\text{g/gdw}$ ) and lipids  
21 ( $32 \pm 0.5\% \text{ dw/dw}$ ) and that this composition does not change whether the cells are grown with a  
22 soluble or an insoluble electron acceptor. The high iron concentration, higher than similar  
23 microorganisms, is attributed to the production of cytochromes that are abundant in

24 transcriptomic analyses in both solid and soluble electron acceptor growth. The unique cell  
25 composition of *G. sulfurreducens* must be considered when growing this microorganism for lab  
26 studies and commercial applications.

27

## 28 **Importance**

29 *Geobacter sulfurreducens* is an electroactive microorganism. In nature, it grows on metallic  
30 minerals by transferring electrons to them, effectively ‘breathing’ metals. In a manmade system,  
31 it respire an electrode to produce an electric current. It has become a model organism for the  
32 study of electroactive organisms. There are potential biotechnological applications of an  
33 organism that can bridge the gap between biology and electrical signal, and as a ubiquitous iron  
34 reducer in soils around the world, *G. sulfurreducens* and its relatives impact the global iron  
35 cycle. We measured the concentrations of metals, macromolecules, and basic elements in *G.*  
36 *sulfurreducens* to define this organism’s composition. We also used gene expression data to  
37 discuss which proteins those metals could be associated with. We found that *G. sulfurreducens*  
38 has a large amount of lipid and iron compared to other bacteria — these observations are  
39 important for future microbiologists and biotechnologists working with the organism.

40

41

## 42 **Introduction**

43 Anode-respiring electroactive bacteria , such as *Geobacter sulfurreducens*, have been  
44 studied for almost two decades for their capability to produce electrical current from metabolic  
45 respiration of organic compounds while in multi-layered biofilms (1–3) . A unique feature of  
46 these biofilms is the extracellular matrix that allows the transport of electrons over tens of

47 micrometers (4–6). As part of this extracellular matrix, several components have been proposed  
48 to be crucial in achieving extracellular electron transport (EET). The transport of electrons starts  
49 at the inner membrane, and travels across the periplasm and outer membrane before it reaches  
50 the extracellular environment. Cytochromes at these locations are known to play an important  
51 role in delivering electrons outside the cell (7–10). Microbial nanowires, now also identified as  
52 cytochrome polymers (4, 6), are the main path by which electrons are thought to be conducted in  
53 the extracellular environment, reaching a solid electron acceptor. Extracellular polymeric  
54 substances (EPS) have also been proposed to play a role in EET in *G. sulfurreducens* as well (3,  
55 11). On the other hand, *Shewanella oneidensis* MR-1 has been shown to produce outer  
56 membrane and periplasmic extensions, which are lipid bilayers and contain extracellular  
57 cytochromes (12, 13). In both cases, it is clear that the EET mechanism creates an extra  
58 metabolic burden to electroactive organisms and that it can alter their cell composition and  
59 nutrient requirements when compared against microorganisms performing respiration of soluble  
60 electron acceptors. These nutrient requirements, however, have not been assessed in a systematic  
61 way.

62         Transcriptomic and proteomic studies in *G. sulfurreducens* have highlighted the  
63 importance of respiratory and EET proteins for their growth on anodes and metal oxides.  
64 Extracellular and outer membrane proteins, including pili, outer membrane channels, and c-type  
65 membrane cytochromes, are essential to the metabolism of *G. sulfurreducens* (9, 14–26). The  
66 high abundance of these proteins and other possible extracellular components may result in a  
67 unique cellular composition. For example, each cytochrome contains one or more iron-  
68 containing heme complexes which can influence the iron content of the cell. An analysis of cell

69 composition can provide insights into the composition of the extracellular matrix and EET-  
70 related components.

71         Several studies have provided insights into the cellular composition of *G. sulfurreducens*.  
72 For example, the lipid fraction of *Geobacter sulfurreducens* was reported 15% wt/wt by  
73 Mahadevan et al., 2006, where an additional 4% lipopolysaccharides fraction was assumed (27).  
74 In comparison, the lipid in *Escherichia coli* has been reported to be 9.1% wt (28) while  
75 cyanobacterium *Synechocystis* sp. PCC6803, known to produce thylakoid membranes, has been  
76 reported to be as high as 14% wt(29) and the lipid-rich microalgae *Schizochytrium* sp. can  
77 contain up to 30% lipid (30). The high lipid content of *G. sulfurreducens* has potential  
78 implications for biotechnology applications.

79         To our knowledge, few studies have performed a metallomic analysis in *G.*  
80 *sulfurreducens*, and the existing literature has conflicting results. Previous research showed that  
81 *G. sulfurreducens*, when grown on fumarate as electron acceptor, has similar metal content to  
82 that of *E. coli*. On the other hand, the closely related organism *Geobacter metallireducens* grown  
83 on iron citrate showed an order of magnitude higher iron content; but the possible formation of  
84 inorganic precipitates was reported to be a possible hindrance to the measurement (31). Another  
85 study found that *G. sulfurreducens* had a per cell iron content an order of magnitude higher than  
86 *E. coli*, and that limiting growth medium iron content inhibited EET in *G. sulfurreducens* (15).

87         In this study, we hypothesized that *G. sulfurreducens* has a significantly different cellular  
88 composition compared to other cells performing soluble respiratory metabolisms. The  
89 differences that stem out of the EET requirements can help explain how EET develops.  
90 Understanding these characteristics can lead to a better growth and maintenance of this  
91 microorganisms in laboratory and applied systems. We performed a metallomic analysis on *G.*

92 *sulfurreducens* grown on an anode versus fumarate as electron acceptors and compared it to *E.*  
93 *coli* K12. The use of an anode allows us to study EET and eliminates the interference of possible  
94 iron oxides reported by Budhreja et al. (31). We also performed an elemental analysis (C, H, O,  
95 N, ash content) and a fraction analysis (protein, carbohydrates, and proteins) to obtain a  
96 comprehensive cell composition and determine if the previously observed lipid fractions  
97 measured in fumarate samples are also observed during anodic respiration. The results are  
98 complemented with a transcriptomic analysis of *G. sulfurreducens* grown under similar  
99 conditions.

## 100 **Materials and Methods**

### 101 **Bacterial strain and culture media**

102 We subcultured *Geobacter sulfurreducens* PCA and *Escherichia coli* K-12 from  
103 commercially available stocks. Medium compositions are listed in detail in Table S1 for four  
104 different cases: 1. *G. sulfurreducens* grown in microbial electrochemical cell (electrode), 2. *G.*  
105 *sulfurreducens* grown in sodium fumarate-containing serum bottle (fumarate), 3. *E. coli* grown in  
106 *Geobacter* medium, and 4. *E. coli* grown in M9 medium. In brief, *Geobacter* medium contained  
107 sodium acetate (50 mM), NaHCO<sub>3</sub> (30 mM), NH<sub>4</sub>Cl (20 mM), NaH<sub>2</sub>PO<sub>4</sub> (4 mM), KCl (1 mM),  
108 vitamin mix (10 mL), and trace minerals (10 mL). Trace minerals contained Nitrilotriacetic acid,  
109 trisodium salt (5.5 mM), MgSO<sub>4</sub>·7H<sub>2</sub>O (12 mM), MnSO<sub>4</sub>·H<sub>2</sub>O (2.9 mM), NaCl (17 mM),  
110 FeSO<sub>4</sub>·7H<sub>2</sub>O (0.36 mM), CaCl<sub>2</sub>·2H<sub>2</sub>O (0.68 mM), CoCl<sub>2</sub>·6H<sub>2</sub>O (0.42 mM), ZnCl<sub>2</sub> (0.95 mM),  
111 CuSO<sub>4</sub>·5H<sub>2</sub>O (0.4 mM), AlK(SO<sub>4</sub>)<sub>2</sub>·12H<sub>2</sub>O (0.2 mM), H<sub>3</sub>BO<sub>4</sub> (0.16 mM), Na<sub>2</sub>MoO<sub>4</sub>·H<sub>2</sub>O (0.01  
112 mM), NiCl<sub>2</sub>·6H<sub>2</sub>O (0.01 mM), and Na<sub>2</sub>WO<sub>4</sub>·2H<sub>2</sub>O (8.5 μM). We provided higher concentration  
113 of acetate (50 mM) than the previous studies(32–34) (10 mM), as we used a higher electrode  
114 surface area requiring more reduced electron donor. For *G. sulfurreducens* grown in serum  
115 bottles, sodium fumarate (100 mM) was added in the medium. We bubbled the media with  
116 N<sub>2</sub>/CO<sub>2</sub> (80:20 v/v) to remove oxygen before autoclaving. After autoclaving, FeCl<sub>2</sub>·4H<sub>2</sub>O (20  
117 μM), Na<sub>2</sub>S·9H<sub>2</sub>O (54 μM), sodium bicarbonate, and vitamins were added in anaerobic glove  
118 box. *E. coli* medium (ATCC Medium 2511 - M9 Minimal Broth) contained glucose (44 mM),  
119 Na<sub>2</sub>HPO<sub>4</sub> (180 mM), KH<sub>2</sub>PO<sub>4</sub> (44 mM), NaCl (17 mM), NH<sub>4</sub>Cl (37 mM), MgSO<sub>4</sub>·7H<sub>2</sub>O (0.2  
120 mM), CaCl<sub>2</sub> (10 μM), and thiamin (24 μM). Media for *E. coli* (M9 and *Geobacter* medium)  
121 were autoclaved without any gas sparging. *Geobacter* medium for *E. coli* contained the same

122 ingredients of *G. sulfurreducens* for microbial electrochemical cells except electron donor; the  
123 same concentration of glucose as M9 (44 mM) were used instead of acetate.

#### 124 **Electrochemical setup and operation**

125 Single-chamber microbial electrochemical cells were constructed in 500 mL bottles with  
126 rubber stoppers located on top having PTFE tubing for gas inflow and outflow, carbon anode as  
127 working electrode, nickel wire cathode as counter electrode, and reference electrode. We used  
128 two square graphite electrodes to grow biofilms of *G. sulfurreducens* with a surface area of  
129  $\sim 20.9 \text{ cm}^2$ , and an Ag/AgCl reference electrode (BASi, West Lafayette, IN). We mixed the  
130 chambers with magnetic stirrer bars at 180 rpm and flushed humidified  $\text{N}_2/\text{CO}_2$  gas (80:20 v/v)  
131 continuously. Before filling up the media in the anaerobic glove box, electrochemical cells were  
132 autoclaved for sterilization. We set -0.3 V vs Ag/AgCl as fixed anode potential using a VMP3  
133 digital potentiostat (Bio-Logic USA, Knoxville, TN). Fumarate-grown *G. sulfurreducens*  
134 reactors were set up in 250 mL serum bottles. Both electrochemical cells and serum bottles were  
135 in a temperature-controlled room at 30 °C. Also, the media filling along with inoculation was  
136 performed in the anaerobic glove box. We used 250 mL flasks for *E. coli* cultivation with M9  
137 and *Geobacter* media. *Geobacter* medium (G medium) for *E. coli* was used to compare the cell  
138 composition with *G. sulfurreducens*. After filling the media and inoculation for *E. coli*, we  
139 placed the flasks in an incubator with shaking at 180 rpm and temperature at 37 °C.

#### 140 **Sample preparation**

141 For the determination of carbohydrate, protein, lipid, metal, and element per dried cell,  
142 we collected the *G. sulfurreducens* grown on anodes in the microbial electrochemical cells and in  
143 serum bottle reactors and the *E. coli* grown in flasks. *G. sulfurreducens* biofilms grown on the  
144 anodes were scraped off with a needle in an anaerobic glove box. Grown cells of *G.*

145 *sulfurreducens* and *E. coli* from the serum bottles and flasks were separated by centrifugation  
146 (Eppendorf Centrifuge 5810 R, USA) at 4000 rpm in microcentrifuge tubes. Cells were washed  
147 once with a Ringer's solution (25% strength) and centrifuged again (Table S1). The cells dried  
148 overnight at 105 °C in plastic tubes and the cool pellets were then broken up with a sterile  
149 stainless-steel spatula.

## 150 **Analytical methods**

151 We measured proteins by bicinchoninic acid (BCA) protein assay (35). In brief, dried cell  
152 biomass (2-3 mg) treated with 0.1 N NaOH at 90 °C for 30 min, re-suspended and centrifuged  
153 the lysate, and used 0.1 mL of supernatant for the assay. Carbohydrates were measured by a  
154 colorimetric method (36). In brief, dried cell biomass (2-3 mg) was acidified in sulfuric acid with  
155 sonication for 2 hours, and dissolved samples (0.5 mL) added in the test tubes with distilled  
156 water (0.5 mL), phenol (50 µL), and sulfuric acid (5 mL) for overnight reaction. Concentrations  
157 of proteins and carbohydrates were determined using calibration curve with bovine serum  
158 albumin and glucose with the absorbance at wavelengths of 485 and 562 nm, respectively. Crude  
159 lipids were extracted from the dried cell biomass using the Folch method (37). The dried biomass  
160 (~15 mg) was sonicated for 1 hour and vortexed for 1 hour with Folch solution (chloroform-  
161 methanol, 2:1, v/v) at room temperature. Solvent extracts were obtained after removing the  
162 biomass by centrifugation at 4000 rpm. The crude lipid weight was determined by evaporating in  
163 the water bath (60 °C) and weighing the tube before and after the evaporation of lipid. For metal  
164 extraction, we added dried cell biomass (3-5 mg) to glass vials along with hydrochloric acid (12  
165 M) and sonicated at 60 °C for 2 hours. The dissolved metals in acid were analyzed by  
166 inductively coupled plasma - optical emission spectrometer (ICP-OES, Thermo iCAP6300).  
167 Carbon, hydrogen, and nitrogen in the dried cell biomass (~2 mg) were measured using CHN



168 Elemental Analyzer (PE2400). Instrumentation for ICP-OES and CHN Elemental Analyzer was  
169 done in Goldwater Environmental Laboratory at Arizona State University. For oxygen  
170 estimation, we measured ash content of the dried cell biomass (~10 mg) following the previous  
171 method (38), burning the biomass at 600 °C in an alumina crucible. Then we subtracted the  
172 fraction of C, H, N, and ash content from the dried cell biomass (100%) for O estimation. Based  
173 on the elemental analysis data (%C, %H, %O, and %N), we obtained the empirical biomass  
174 formula followed by Equation 1 below (39),

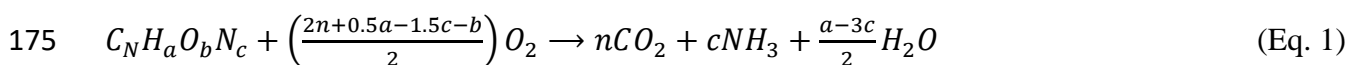

176 where,  $n = \frac{\%C}{12T}$ ,  $a = \frac{\%H}{T}$ ,  $b = \frac{\%O}{16T}$ , and  $c = \frac{\%N}{14T}$ ,

177 and,  $T = \frac{\%C}{12T} + \frac{\%H}{T} + \frac{\%O}{16T} + \frac{\%N}{14T}$ .

## 178 **Transcriptomic analysis**

179 We sequenced reverse transcribed RNA from *G. sulfurreducens* grown in a single chamber  
180 microbial electrochemical cell as an anode biofilm with an anode poised at -0.28 V vs. Ag/AgCl  
181 as the electron acceptor, and in anaerobic test tubes with fumarate as the electron acceptor. Both  
182 conditions were collected in biological triplicate. We extracted RNA with the Qiagen/MOBIO  
183 PowerMicrobiome RNA extraction kit and used the ThermoFisher MicrobExpress bacterial  
184 mRNA enrichment kit to reduce the fraction of rRNA following manufacturer's  
185 recommendations. RNA library preparation and sequencing were performed by the genomics  
186 core facility at ASU. We mapped the reads to the RefSeq assembly for *G. sulfurreducens* PCA  
187 and used DESeq2 in R for differential expression analysis. The cutoff determination for  
188 differential expression was set as a log<sub>2</sub> fold change of at least 1.5 and a multiple comparison  
189 adjusted *p*-value of less than 0.05. The sequencing data we used here is a subset of data analyzed

190 in a previous publication, and raw sequence data is available from NCBI under accession number  
191 GSE200066 (40).

192

## 193 **Results and Discussion**

### 194 *Elemental analysis*

195 We analyzed the trace metals and macronutrients of dried *G. sulfurreducens* and *E. coli*  
196 grown in the lab with different environments (Table S3, Table 3, Figure 1). We found significant  
197 differences between the two species in the mass fraction of several trace metals (Figure 1, Table  
198 S3, Figure S1). Media compositions were different in each growth condition, matching each  
199 organism's requirements (Table S2). There were few differences between anode-grown and  
200 fumarate grown *G. sulfurreducens*. Significant differences in Mn and Fe content were observed  
201 in *E. coli* when growing in M9 medium versus *Geobacter* medium. Given the low abundance of  
202 nutrients in M9's minimal medium, significant increases in Cu, Fe, Mn, and Se were observed  
203 when *E. coli* was grown in *Geobacter* medium. We use this latter condition as point of reference  
204 when comparing *G. sulfurreducens* and *E. coli*.

205 Several metals were present at higher concentrations in anode- and fumarate-grown *G.*  
206 *sulfurreducens* when compared to *E. coli*, but only a subset of them had statistically significant  
207 differences between the organisms (Table S3, Figure 1).

208

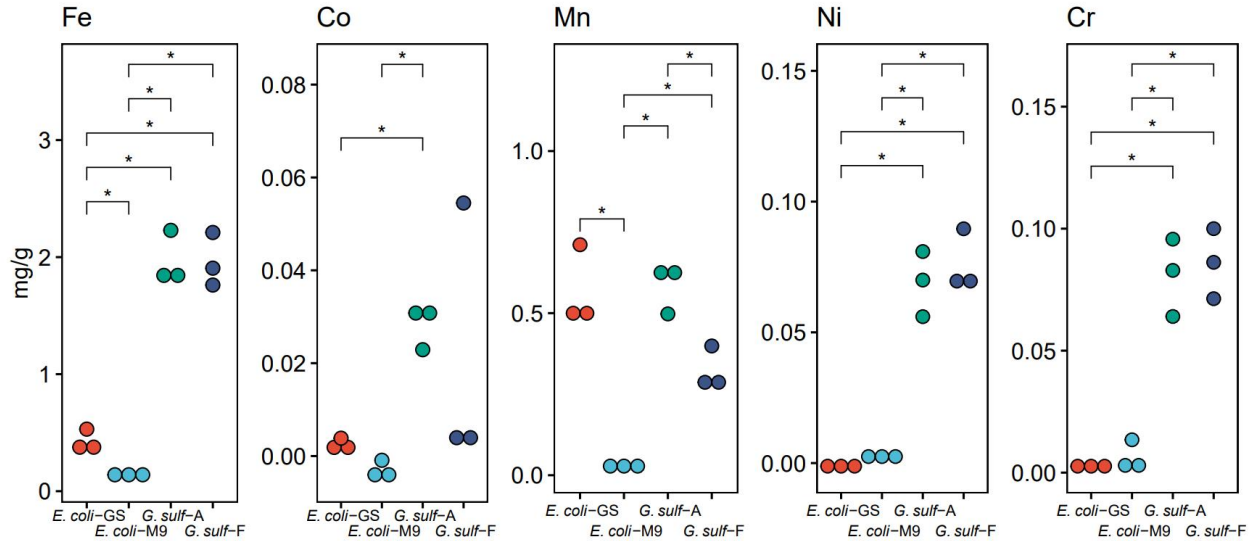

209

210 **Figure 1.** Relevant differences in metal concentrations between *E. coli*-GS (Geobacter medium),  
 211 *E. coli*-M9 (M9 medium), *G. sulf*-A (biofilm grown on an electrode), and *G. sulf*-F (planktonic  
 212 cells using fumarate as the electron acceptor). See Figure S1 for more comparisons. \*( $p < 0.05$ ),  
 213 pairwise t-test with multiple comparison correction performed with the Benjamini-Hochberg  
 214 method. We chose to omit alkali metals from this figure, but Lithium did have significant  
 215 differences as well (Table S1).

216

### 217 *Metals used as cofactors*

218 Fe is a required trace metal for cellular respiration in many organisms as the cofactor in  
 219 cytochromes. In both growth conditions for *G. sulfurreducens*, Fe was much higher than in *E.*  
 220 *coli*, which suggest a much higher abundance of Fe-containing metalloproteins and other iron-  
 221 containing biomolecules (Figure 1).

222 In previous studies, listed in Table 1, anaerobic bacteria are reported to have more iron  
 223 per cell biomass than aerobic bacteria. Phototrophic bacteria (*Rhodospirillum*,  
 224 *Rhodopseudomonas*, *Chromatium*) and facultative bacteria (*Escherichia*, *Enterobacter*) have  
 225 150-500  $\mu\text{g/gdw}$  Fe. *Desulfovibrio vulgaris*, an anaerobic Deltaproteobacterium like *G.*  
 226 *sulfurreducens*, has over 900  $\mu\text{g/gdw}$ . Not included in our analysis are iron oxidizing bacteria,  
 227 whose Fe precipitates can lead to Fe concentrations over 2% by dry mass (41). To our

228 knowledge, *G. sulfurreducens* has the highest Fe content among bacteria studied, with almost  
 229 twice the content of *D. vulgaris*. This is consistent with their production of heme-containing  
 230 cytochromes in much higher abundance than other microorganisms, leading to not only  
 231 cytoplasmic and membrane metalloproteins, but also an extensive abundance of extracellular  
 232 cytochromes. Growing *G. sulfurreducens* on the anode versus fumarate did not change the total  
 233 Fe amount, suggesting similar abundance of Fe metalloproteins. OmcS nanowires have been  
 234 isolated from fumarate culture (6), indicating that *G. sulfurreducens* does not necessarily  
 235 downregulate its EET metabolism when it is not needed. Our gene expression data also shows a  
 236 high expression of cytochromes associated with EET in fumarate and anode biofilm culture  
 237 (Figure 2).

238

239 **Table 1.** Amount of iron in different prokaryotic species

| Bacterial species                  | Iron (ug Fe/gdw)        | References                       |
|------------------------------------|-------------------------|----------------------------------|
| <i>Rhodospirillum rubrum</i>       | Light - 202 ( $\pm$ 13) |                                  |
|                                    | Dark - 198 ( $\pm$ 10)  |                                  |
| <i>Rhodopseudomonas spheroides</i> | Light - 163 ( $\pm$ 21) | Kassner & Kamen, 1968*           |
|                                    | Dark - 230 ( $\pm$ 24)  | (42)                             |
| <i>Chromatium</i>                  | Light - 456 ( $\pm$ 76) |                                  |
| <i>Desulfovibrio vulgaris</i>      | 952                     | Lancaster et al., 2014**         |
| <i>Enterobacter cloacae</i>        | 154                     | (43)                             |
| <i>Escherichia coli</i>            | 223                     | Hartmann and Braun, 1981<br>(44) |

|                                 |                          |                                    |
|---------------------------------|--------------------------|------------------------------------|
|                                 | 280                      | Abdul-Tehrani et al., 1999<br>(45) |
|                                 | 300                      |                                    |
| <i>Micrococcus roseus</i>       | 200                      | Rouf, 1964                         |
| <i>Bacillus cercus</i>          | 300~400                  | (41)                               |
| <i>Pseudomonas aeruginosa</i>   | 0.1                      | Ma et al., 1999 (46)               |
| <i>Shewanella oneidensis</i>    | 147 <sup>s</sup>         | Daly et al., 2004 (47)             |
| <i>Escherichia coli</i>         | G medium - 430 (± 90)    |                                    |
|                                 | M9 medium - 130 (± 50)   | This study                         |
| <i>Geobacter sulfurreducens</i> | Electrode - 1970 (± 226) |                                    |
|                                 | Fumarate - 1960 (± 229)  |                                    |

240 \* Photosynthetic bacteria were grown in different growth conditions with and without light  
 241 exposure. \*\* Iron in *D. vulgaris* and *E. cloacae* were estimated with the measured iron per total  
 242 protein of the cells; we used a conversion factor of 0.55 to convert from protein to volatile solids  
 243 (28). <sup>s</sup> *S. oneidensis* iron content was converted from nmol Fe/ mg protein to µg Fe/gdw using  
 244 52.8% protein content as measured previously (48).

245

246 Fe may be a limiting trace mineral in commonly used *G. sulfurreducens* media. Estevez-  
 247 Canales et al. found that a medium concentration of 2 µM Fe limits biomass culture in a  
 248 chemostat growing *G. sulfurreducens* led to a culture with 1.9 x 10<sup>-6</sup> ng of Fe per cell (15). This  
 249 iron content matches our measurements if we assume a per cell dry weight of 1 picogram.

250 Nickel, cobalt, and chrome content were significantly higher in both *G. sulfurreducens*  
 251 conditions relative to *E. coli* (Table S3, Figure 1). Nickel is a cofactor in Ni-Fe hydrogenases,  
 252 and the genome of *G. sulfurreducens* encodes for several (49, 50). *G. sulfurreducens* is able to

253 assimilate cobalt through its cobamide-synthesis pathways (51), but it may also be precipitated  
254 on the cell surface as a defense mechanism against cobalt toxicity (52).

255

### 256 *Precipitating metals*

257 There are some metals that may be overrepresented in our *G. sulfurreducens* samples due to  
258 precipitation. *G. sulfurreducens* requires at least two multicopper proteins, OmpC and OmpB, to  
259 respire Fe (III) oxide (53), and while these and other metalloproteins are a likely reservoir of Cu  
260 in our samples, *G. sulfurreducens* is capable of reducing Cu(II) to Cu<sub>2</sub>S nanoparticles that  
261 associate with cells (54). This phenomenon makes it difficult to estimate how much copper was  
262 required for metalloproteins, and how much may have been trapped as inorganic precipitates. *G.*  
263 *sulfurreducens* can also immobilize through dissimilatory reduction (55). In our data, the *G.*  
264 *sulfurreducens* samples were enriched in Cr compared to *E. coli* (Figure 1), while differences in  
265 Cu were not statistically significant. Manganese was significantly lower in the *E. coli* grown with  
266 M9 medium compared to all other conditions including *E. coli* grown with the *G. sulfurreducens*  
267 medium recipe because M9 medium does not contain manganese (Figure 1, Table S2).

268

269 Based on the metal content of the *G. sulfurreducens* cells collected, we can estimate a  
270 maximum cell density from the available mineral content in the common Geobacter medium  
271 (ATCC 1957). Table S4 shows the estimated growth cell assuming cells require the observed  
272 metal concentrations and only have the medium as a source. As expected, Fe is the most limiting  
273 metal in the medium, allowing for only 0.10 g cells/L. Cu and Zn are also close to this limitation  
274 and could lead to a multi-nutrient limitation when growing *G. sulfurreducens* at ~0.1 g/L. This  
275 nutrient limitation can either limit cell density in cell suspensions or limit current generation in

276 microbial electrochemical technologies when operated in batch mode. Assuming a current  
277 production of ~0.28 A/g protein (56) or 0.6 A/g cell (based on Table 2), one liter of *Geobacter*  
278 medium can support enough *G. sulfurreducens* cells to produce 60 mA, an amount of current that  
279 is enough for most experimental setups but might be limiting in electrochemical cells with a high  
280 specific surface area.

281

282 *Cell composition of G. sulfurreducens is different to an average bacterium*

283 We also studied the cell composition and elemental analysis (C, H, O, N, Ash) of *G.*  
284 *sulfurreducens*. Interestingly, the *G. sulfurreducens* cell showed a high abundance of lipids in  
285 both growth conditions (Table 3). The values of ~32% lipid content were much higher than  
286 previously reported and similar to lipid-accumulating algal cultures (57–59). We do not know the  
287 reason why *G. sulfurreducens* requires such a high lipid content. Their smaller diameter (~ 0.5  
288  $\mu\text{m}$ ) and distinct morphology (60) compared to other rod-shape bacteria certainly plays a role in  
289 the increased lipid content. *Shewanella oneidensis*, another electrogenic organism, is known to  
290 produce outer membrane extensions for electron transfer (13). While it is likely that our analysis  
291 captured some extracellular polymeric substances, the extracellular matrix of *G. sulfurreducens*  
292 has not been found to have a significant lipid component (61). Most microorganisms exhibiting  
293 this high lipid fraction have either lipid accumulation, as in the case of certain algal species (57–  
294 59) or have internal lipid structures that increase its relative fraction as in the case of thylakoid  
295 membranes and intracytoplasmic membranes (62–64).

296 Because of the higher lipid content, *G. sulfurreducens* cells show a significantly lower  
297 protein content when compared to other microorganisms (~22-26%, Table 3). Fumarate-grown  
298 cells had a larger protein fraction than in anode-grown cells. On the other hand, total

299 carbohydrates were ~2 times higher in anode-grown cell; exopolysaccharide (EPS) excreted from  
 300 *G. sulfurreducens* to form a biofilm on the electrode probably increases the carbohydrate content  
 301 in this growth condition.

302 Our elemental analysis of *G. sulfurreducens* cells is consistent with the low protein, high  
 303 lipid content measured. Following Eq. 1, empirical cell biomass formulas of *G. sulfurreducens*,  
 304 normalized to N, were calculated as  $C_{5.77}H_{10.61}O_{2.43}N$  for electrode-grown and  $C_{6.58}H_{12.48}O_{3.02}N$   
 305 for fumarate-grown cells. Compared with general formulas for bacterial biomass, such as  
 306  $C_5H_7O_2N$  (39), *G. sulfurreducens* has a higher C:N ratio typical of a low protein content. It also  
 307 has a higher hydrogen content, due to the higher lipid content that has approximately a 1:2 for  
 308 fumarate-grown cells.

309  
 310 **Table 2** Cell compositions of *G. sulfurreducens* and *E. coli* in different growth conditions. Error  
 311 is the sample standard deviation.

| Growth condition                  | <i>G. sulf.</i><br>electrode | <i>G. sulf.</i><br>fumarate | <i>E. coli</i><br>M9 medium |              |
|-----------------------------------|------------------------------|-----------------------------|-----------------------------|--------------|
| Proteins (mg BSA/gdw)             | 215 (± 7)                    | 262 (± 56)                  | 284 (± 15)                  |              |
| Crude Lipids (mg/gdw)             | 323 (± 45)                   | 321 (± 35)                  | 243 (± 36)                  |              |
| Carbohydrates<br>(mg glucose/gdw) | 193 (± 11)                   | 87 (± 24)                   | 68 (± 19)                   |              |
| Elements                          | C (%)                        | 47.0 (± 1.1)                | 46.8 (± 1.8)                | 46.9 (± 0.7) |
|                                   | H (%)                        | 7.2 (± 0.6)                 | 7.4 (± 0.1)                 | 7.4 (± 1.0)  |
|                                   | N (%)                        | 9.5 (± 0.2)                 | 8.3 (± 0.3)                 | 12.5 (± 0.0) |
|                                   | O (%)                        | 26.4 (± 3.3)                | 28.6 (± 3.9)                | 24.8 (± 2.0) |
|                                   | Ash (%)                      | 9.9 (± 3.0)                 | 9.0 (± 3.3)                 | 8.4 (± 1.3)  |

312



313 We compared our cellular composition of *G. sulfurreducens* to that reported in Mahadevan et al.  
314 2006 (27). The main differences between the fraction distributions reported here and those  
315 reported in Mahadevan et al. is the higher lipid content at the expense of a lower protein content.  
316 We do not know the reason for the discrepancy, but in both cases the lipid content is significantly  
317 higher than *E. coli* and other bacterial cells.

318

319

320 *Iron-containing genes are highly expressed*

321 Our analysis identified 434 genes that were differentially expressed between the anode biofilm  
322 samples and the planktonic fumarate cells out of 3434 annotated genes detected at quantifiable  
323 levels. 205 genes were more highly expressed in the anode biofilm, and 229 genes were more  
324 highly expressed in the planktonic samples. In Figure 2, MA plots visualize the differential  
325 expression and highlight several types of iron-containing protein-coding genes. While a greater  
326 number of cytochromes were significantly upregulated in the anode biofilm than the number  
327 upregulated in the planktonic samples, most cytochromes were not differentially expressed.  
328 Ferritin domain containing protein- and nonheme Fe-S domain protein-coding genes were also  
329 present among the differentially expressed genes. Our data show that iron-containing protein-  
330 coding genes are expressed in both planktonic fumarate cultures and anode biofilms, but that  
331 there are specific iron-related genes whose expression depends on growth conditions. The  
332 abundance of expression of Fe-containing proteins is consistent with the high Fe abundance in  
333 both conditions.

334

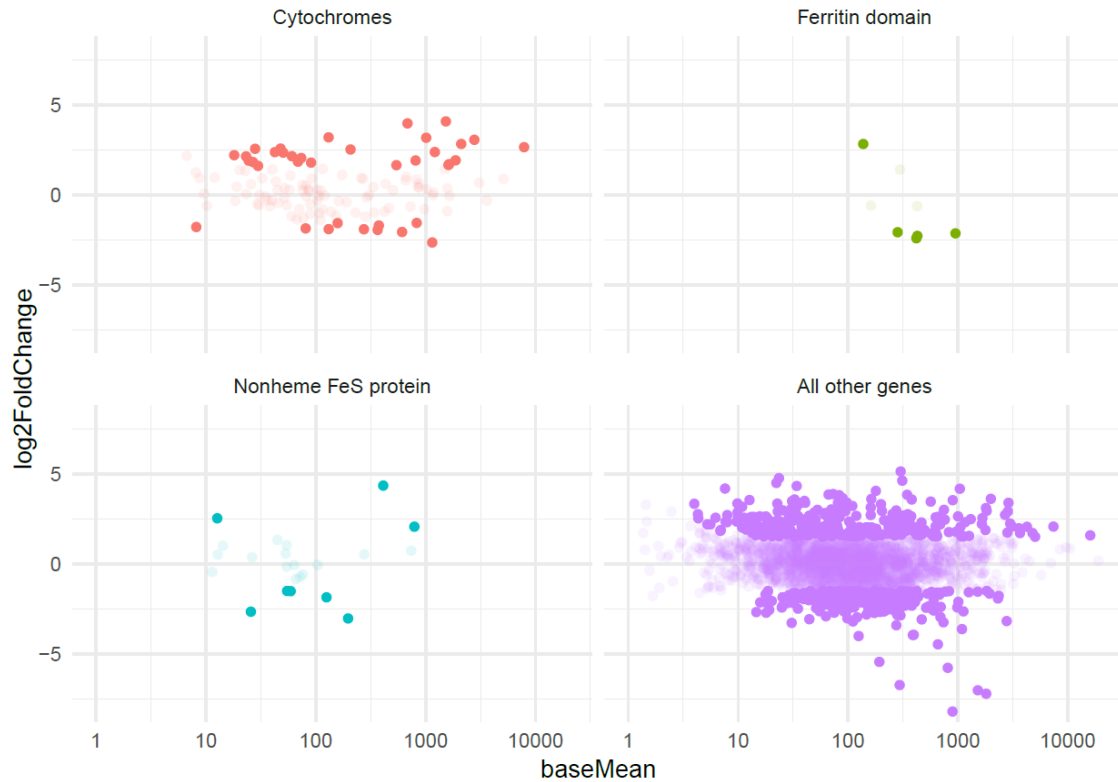

335

336 **Figure 2** MA plots of mRNA gene expression data comparing planktonic cells and anode  
337 biofilms. Positive log<sub>2</sub> fold change indicates higher expression in the anode biofilm condition.

338 Solid points indicate a log<sub>2</sub> fold change greater than 1.5 and an adjusted *p*-value below 0.05.

339

340

### 341 **Conclusions**

342 *G. sulfurreducens* is a bacterium with a complex system of electroactive proteins, and those  
343 electroactive proteins largely require iron. This may be a factor in the high iron concentration we  
344 measured in *G. sulfurreducens* relative to non-electroactive Gram-negative *E. coli* and values  
345 reported in literature for other bacteria. Our analysis complements previous work showing that  
346 restricting iron limits EET in *G. sulfurreducens* (15). This study estimates what the nutrient  
347 limitations might be for *G. sulfurreducens*, and this information is valuable for biotechnologists  
348 developing applications using this and similar organisms. The nearly identical composition

349 between anode-grown and fumarate-grown cells supports the hypothesis that *G. sulfurreducens*  
350 is not adapted to efficiently grow on fumarate – it makes electron carriers for EET regardless of  
351 the electron acceptor if the nutrients are available. The lipid content measured in *G.*  
352 *sulfurreducens* was higher than what has been reported before, and relatively high for a  
353 bacterium without lipidic storage. While all samples were taken from active biofilms or  
354 suspended cultures, we did not have a mechanism to separate dead cells from active cells, and it  
355 is probable that the composition of an individual cell may differ from the composition of the bulk  
356 samples analyzed. When compared to similar studies on other bacteria and the *E. coli* in our  
357 study, we have shown that *G. sulfurreducens* has a unique composition to support its complex  
358 metabolism.

359

360

## 361 **Acknowledgements**

362 The funding for this work was provided by Office of Naval Research (ONR awards N0014-15-1-  
363 2702 and N0014-20-1-2269). We also thank Roy Erickson and Adam Smith for assistance of  
364 ICP-OES and elemental analysis (Goldwater Environmental Laboratory at ASU) and the  
365 Genomics Core at ASU for sequencing.

366

## 367 **References**

- 368 1. Torres CI. 2014. On the importance of identifying, characterizing, and predicting  
369 fundamental phenomena towards microbial electrochemistry applications. *Curr Opin*  
370 *Biotechnol* 27:107–114.
- 371 2. Reguera G, Nevin KP, Nicoll JS, Covalla SF, Woodard TL, Lovley DR. 2006. Biofilm  
372 and nanowire production leads to increased current in *Geobacter sulfurreducens* fuel cells.

- 373 Appl Environ Microbiol 72:7345–7348.
- 374 3. Bond DR, Strycharz-Glaven SM, Tender LM, Torres ICI. 2012. On Electron Transport  
375 through Geobacter Biofilms. ChemSusChem 5:1099–1105.
- 376 4. Lovley DR, Walker DJF. 2019. Geobacter Protein Nanowires. Front Microbiol 10.
- 377 5. Chadwick GL, Jiménez F, Gralnick JA, Bond DR, Orphan VJ. 2019. NanoSIMS imaging  
378 reveals metabolic stratification within current-producing biofilms. Proc Natl Acad Sci  
379 <https://doi.org/10.1073/pnas.1912498116>.
- 380 6. Wang F, Coureuil M, Osinski T, Orlova A, Altindal T, Gesbert G, Nassif X, Egelman EH,  
381 Craig L. 2017. Cryoelectron Microscopy Reconstructions of the Pseudomonas aeruginosa  
382 and Neisseria gonorrhoeae Type IV Pili at Sub-nanometer Resolution. Structure 25:1423-  
383 1435.e4.
- 384 7. Otero FJ, Chi Ho Chan DRB. 2018. Identification of Different Putative Outer Membrane  
385 Electron Conduits Necessary for Fe(III) Citrate, Fe(III) Oxide, Mn(IV) Oxide, or  
386 Electrode Reduction by Geobacter sulfurreducens. J Bacteriol 200:1–20.
- 387 8. Levar CE, Hoffman CL, Dunshee AJ, Toner BM, Bond DR. 2017. Redox potential as a  
388 master variable controlling pathways of metal reduction by Geobacter sulfurreducens  
389 11:741–752.
- 390 9. Zacharoff L, Chan CH, Bond DR. 2016. Reduction of low potential electron acceptors  
391 requires the CbcL inner membrane cytochrome of Geobacter sulfurreducens.  
392 Bioelectrochemistry 107:7–13.
- 393 10. Pessanha M, Morgado L, Louro RO, Londer YY, Pokkuluri PR, Schiffer M, Salgueiro  
394 CA. 2006. Thermodynamic Characterization of Triheme Cytochrome PpcA from  
395 Geobacter sulfurreducens : Evidence for a Role Played in e<sup>-</sup> / H<sup>+</sup> Energy Transduction.

- 396 Biochemistry 45:13910–13917.
- 397 11. Rollefson JB, Stephen CS, Tien M, Bond DR. 2011. Identification of an extracellular  
398 polysaccharide network essential for cytochrome anchoring and biofilm formation in  
399 *Geobacter sulfurreducens*. *J Bacteriol* 193:1023–1033.
- 400 12. Subramanian P, Pirbadian S, El-Naggar MY, Jensen GJ. 2018. Ultrastructure of  
401 *Shewanella oneidensis* MR-1 nanowires revealed by electron cryotomography. *Proc Natl*  
402 *Acad Sci* 201718810.
- 403 13. Pirbadian S, Barchinger SE, Leung KM, Byun HS, Jangir Y, Bouhenni RA, Reed SB,  
404 Romine MF, Saffarini DA, Shi L, Gorby YA, Golbeck JH, El-Naggar MY. 2014.  
405 *Shewanella oneidensis* MR-1 nanowires are outer membrane and periplasmic extensions  
406 of the extracellular electron transport components. *Proc Natl Acad Sci U S A* 111:12883–  
407 8.
- 408 14. Kim BC, Leang C, Ding YHR, Glaven RH, Coppi M V., Lovley DR. 2005. OmcF , a  
409 Putative c -Type Monoheme Outer Membrane Cytochrome Required for the Expression of  
410 Other Outer Membrane Cytochromes in *Geobacter sulfurreducens*. *J Bacteriol* 187:4505–  
411 4513.
- 412 15. Estevez-Canales M, Kuzume A, Borjas Z, Füeg M, Lovley D, Wandlowski T, Esteve-  
413 Núñez A. 2015. A severe reduction in the cytochrome C content of *Geobacter*  
414 *sulfurreducens* eliminates its capacity for extracellular electron transfer. *Environ*  
415 *Microbiol Rep* 7:219–226.
- 416 16. Peng L, Zhang Y. 2017. Cytochrome OmcZ is essential for the current generation by  
417 *Geobacter sulfurreducens* under low electrode potential. *Electrochim Acta* 228:447–452.
- 418 17. Jiménez Otero F, Chadwick GL, Yates MD, Mickol RL, Saunders SH, Glaven SM,

- 419 Gralnick JA, Newman DK, Tender LM, Orphan VJ, Bond DR. 2021. Evidence of a  
420 Streamlined Extracellular Electron Transfer Pathway from Biofilm Structure, Metabolic  
421 Stratification, and Long-Range Electron Transfer Parameters. *Appl Environ Microbiol* 87.  
422 18. Joshi K, Chan CH, Bond DR. 2021. *Geobacter sulfurreducens* inner membrane  
423 cytochrome CbcBA controls electron transfer and growth yield near the energetic limit of  
424 respiration. *Mol Microbiol* 116:1124–1139.
- 425 19. Leang C, Adams LA, Chin KJ, Nevin KP, Methé BA, Webster J, Sharma ML, Lovley DR.  
426 2005. Adaptation to disruption of the electron transfer pathway for Fe(III) reduction in  
427 *Geobacter sulfurreducens*. *J Bacteriol* 187:5918–5926.
- 428 20. Lloyd JR, Leang C, Hodges Myerson AL, Coppi M V., Cui S, Methé B, Sandler SJ,  
429 Lovley DR. 2003. Biochemical and genetic characterization of PpcA, a periplasmic c-type  
430 cytochrome in *Geobacter sulfurreducens*. *Biochem J* 369:153–161.
- 431 21. Mehta T, Coppi M V., Childers SE, Lovley DR. 2005. Outer Membrane c-Type  
432 Cytochromes Required for Fe(III) and Mn(IV) Oxide Reduction in *Geobacter*  
433 *sulfurreducens*. *Microbiology* 151:8634–8641.
- 434 22. Shelobolina ES, Coppi M V., Korenevsky AA, DiDonato LN, Sullivan SA, Konishi H, Xu  
435 H, Leang C, Butler JE, Kim BC, Lovley DR. 2007. Importance of c-type cytochromes for  
436 U(VI) reduction by *Geobacter sulfurreducens*. *BMC Microbiol* 7:1–15.
- 437 23. Nevin KP, Kim BC, Glaven RH, Johnson JP, Woodward TL, Methé BA, Didonato RJ,  
438 Covalla SF, Franks AE, Liu A, Lovley DR. 2009. Anode biofilm transcriptomics reveals  
439 outer surface components essential for high density current production in *Geobacter*  
440 *sulfurreducens* fuel cells. *PLoS One* 4.
- 441 24. Aklujkar M, Coppi M V., Leang C, Kim BC, Chavan MA, Perpetua LA, Giloteaux L, Liu

- 442 A, Holmes DE. 2013. Proteins involved in electron transfer to Fe(III) and Mn(IV) oxides  
443 by *Geobacter sulfurreducens* and *Geobacter uraniireducens*. *Microbiol (United Kingdom)*  
444 159:515–535.
- 445 25. Levar CE, Chan CH, Mehta-Kolte MG, Bond DR. 2014. An inner membrane cytochrome  
446 required only for reduction of high redox potential extracellular electron acceptors. *MBio*  
447 5:1–9.
- 448 26. Liu Y, Fredrickson JK, Zachara JM, Shi L. 2015. Direct involvement of ombB, omaB, and  
449 omcB genes in extracellular reduction of Fe(III) by *Geobacter sulfurreducens* PCA. *Front*  
450 *Microbiol* 6:1–8.
- 451 27. Mahadevan R, Bond DR, Butler JE, Coppi M V. 2006. Characterization of Metabolism in  
452 the Fe ( III ) -Reducing Organism *Geobacter sulfurreducens* by Constraint-Based  
453 Modeling. *Appl Environ Microbiol* 72:1558–1568.
- 454 28. Neidhart FC, Ingraham JL, Schaechter M. 1990. *Physiology of the Bacterial Cell: A*  
455 *Molecular Approach*. Sinauer Associates, Sunderland, Mass.
- 456 29. Cuellar-Bermudez SP, Romero-Ogawa MA, Vannela R, Lai YJS, Rittmann BE, Parra-  
457 Saldivar R. 2015. Effects of light intensity and carbon dioxide on lipids and fatty acids  
458 produced by *Synechocystis* sp. PCC6803 during continuous flow. *Algal Res* 12:10–16.
- 459 30. Byreddy AR, Barrow CJ, Puri M. 2016. Bead milling for lipid recovery from  
460 thraustochytrid cells and selective hydrolysis of *Schizochytrium* DT3 oil using lipase.  
461 *Bioresour Technol* 200:464–469.
- 462 31. Budhraj R, Ding C, Walter P, Wagner S, Reemtsma T, Gary Sawers R, Adrian L. 2019.  
463 The impact of species, respiration type, growth phase and genetic inventory on absolute  
464 metal content of intact bacterial cells. *Metallomics* 11:925–935.

- 465 32. Snider RM, Strycharz-Glaven SM, Tsoi SD, Erickson JS, Tender LM. 2012. Long-range  
466 electron transport in *Geobacter sulfurreducens* biofilms is redox gradient-driven. *Proc Natl*  
467 *Acad Sci* 109:15467–15472.
- 468 33. Strycharz-Glaven SM, Snider RM, Guiseppi-Elie A, Tender LM. 2011. On the electrical  
469 conductivity of microbial nanowires and biofilms. *Energy Environ Sci* 4:4366–4379.
- 470 34. Yates MD, Strycharz-Glaven SM, Golden JP, Roy J, Tsoi S, Erickson JS, El-Naggar MY,  
471 Barton SC, Tender LM. 2016. Measuring conductivity of living *geobacter sulfurreducens*  
472 biofilms. *Nat Nanotechnol* 11:910–913.
- 473 35. Brown RE, Jarvis KL, Hyland KJ. 1989. Protein measurement using bicinchoninic acid:  
474 elimination of interfering substances. *Anal Biochem* 180:136–139.
- 475 36. DuBois M, Gilles KA, Hamilton JK, Rebers PA, Smith F. 1956. Colorimetric Method for  
476 Determination of Sugars and Related Substances. *Anal Chem* 28:350–356.
- 477 37. Folch J, Lees M, Sloane Stanley GH. 1957. A simple method for the isolation and  
478 purification of total lipides from animal tissues. *J Biol Chem* 226:497–509.
- 479 38. Sluiter A, Hames B, Ruiz R, Scarlata C, Sluiter J, Templeton D, Crocker D. 2008.  
480 Determination of structural carbohydrates and lignin in Biomass. *Natl Renew Energy Lab*  
481 17.
- 482 39. McCarty PL, Rittmann BE. 2001. *Environmental biotechnology: principles and*  
483 *applications*. McGraw-Hill.
- 484 40. Howley E, Krajmalnik-brown R, Torres CI. 2022. Cytochrome expression shifts in  
485 *Geobacter sulfurreducens* to maximize energy conservation in response to changes in  
486 redox conditions 1–34.
- 487 41. Rouf MA. 1964. Spectrochemical Analysis of Inorganic Elements in Bacteria. *J Bacteriol*



- 488 88:1545–1549.
- 489 42. Kassner RJ, Kamen MD. 1968. Trace Metal Composition of Photosynthetic Bacteria.  
490 *Biochim Biophys Acta* 153:270–278.
- 491 43. Lancaster WA, Menon AL, Scott I, Poole FL, Vaccaro BJ, Thorgersen MP, Geller J,  
492 Hazen TC, Hurt RA, Brown SD, Elias DA, Adams MWW. 2014. Metallomics of two  
493 microorganisms relevant to heavy metal bioremediation reveal fundamental differences in  
494 metal assimilation and utilization. *Metallomics* 6:1004–1013.
- 495 44. Hartmann A, Braun V. 1981. Iron uptake and iron limited growth of *Escherichia coli* K-  
496 12. *Arch Microbiol* 130:353–356.
- 497 45. Abdul-Tehrani H, Hudson AJ, Chang YS, Timms AR, Hawkins C, Williams JM, Harrison  
498 PM, Guest JR, Andrews SC. 1999. Ferritin mutants of *Escherichia coli* are iron deficient  
499 and growth impaired, and *fur* mutants are iron deficient. *J Bacteriol* 181:1415–1428.
- 500 46. Ma JF, Ochsner UA, Klotz MG, Nanayakkara VK, Howell ML, Johnson Z, Posey JE,  
501 Vasil ML, Monaco JJ, Hassett DJ. 1999. Bacterioferritin A modulates catalase A (KatA)  
502 activity and resistance to hydrogen peroxide in *Pseudomonas aeruginosa*. *J Bacteriol*  
503 181:3730–3742.
- 504 47. Daly MJ, Gaidamakova EK, Matrosova VY, Vasilenko A, Zhai M, Venkateswaran A,  
505 Hess M, Omelchenko M V., Kostandarithes HM, Makarova KS, Wackett LP, Fredrickson  
506 JK, Ghosal D. 2004. Accumulation of Mn(II) in *Deinococcus radiodurans* Facilitates  
507 Gamma-Radiation Resistance. *Science* (80- ) 306:1025–1028.
- 508 48. Pinchuk GE, Hill EA, Geydebekht O V., de Ingeniis J, Zhang X, Osterman A, Scott JH,  
509 Reed SB, Romine MF, Konopka AE, Beliaev AS, Fredrickson JK, Reed JL. 2010.  
510 Constraint-based model of *Shewanella oneidensis* MR-1 metabolism: A tool for data

- 511 analysis and hypothesis generation. *PLoS Comput Biol* 6:1–8.
- 512 49. Coppi M V. 2005. The hydrogenases of *Geobacter sulfurreducens*: A comparative  
513 genomic perspective. *Microbiology* 151:1239–1254.
- 514 50. Tremblay PL, Lovley DR. 2012. Role of the NiFe hydrogenase *hya* in oxidative stress  
515 defense in *Geobacter sulfurreducens*. *J Bacteriol* 194:2248–2253.
- 516 51. Yan J, Ritalahti KM, Wagner DD, Löffler FE. 2012. Unexpected specificity of  
517 interspecies cobamide transfer from *geobacter* spp. to organohalide-respiring  
518 *dehalococcoides mccartyi* strains. *Appl Environ Microbiol* 78:6630–6636.
- 519 52. Dulay H, Tabares M, Kashefi K, Reguera G. 2020. Cobalt Resistance via Detoxification  
520 and Mineralization in the Iron-Reducing Bacterium *Geobacter sulfurreducens*. *Front*  
521 *Microbiol* 11:1–17.
- 522 53. Holmes DE, Mester T, O’Neil RA, Perpetua LA, Larrahondo MJ, Glaven R, Sharma ML,  
523 Ward JE, Nevin KP, Lovley DR. 2008. Genes for two multicopper proteins required for  
524 Fe(III) oxide reduction in *Geobacter sulfurreducens* have different expression patterns  
525 both in the subsurface and on energy-harvesting electrodes. *Microbiology* 154:1422–1435.
- 526 54. Nanoparticles CS, Kimber RL, Bagshaw H, Smith K, Buchanan DM, Coker VS, Cavet JS,  
527 Lloyd JR. 2020. Biomineralization of Cu<sub>2</sub>S Nanoparticles by *Geobacter sulfurreducens*.  
528 *Appl Environ Microbiol* 86:1–11.
- 529 55. Gong Y, Werth CJ, He Y, Su Y, Zhang Y, Zhou X. 2018. Intracellular versus extracellular  
530 accumulation of Hexavalent chromium reduction products by *Geobacter sulfurreducens*  
531 PCA. *Environ Pollut* 240:485–492.
- 532 56. Otero FJ, Chadwick GL, Yates MD, Mickol RL, Saunders SH, Glaven SM, Gralnick JA,  
533 Newman DK, Tender LM, Orphan VJ, Bond DR. 2021. Evidence of a Streamlined

- 534 Extracellular Electron Transfer Pathway from Biofilm Structure, Metabolic Stratification,  
535 and Long-Range Electron Transfer Parameters. *Appl Environ Microbiol* 87:1–16.
- 536 57. Ma C, Wen H, Xing D, Pei X, Zhu J, Ren N, Liu B. 2017. Molasses wastewater treatment  
537 and lipid production at low temperature conditions by a microalgal mutant *Scenedesmus*  
538 sp. Z-4. *Biotechnol Biofuels* 10:1–13.
- 539 58. Wahidin S, Idris A, Shaleh SRM. 2013. The influence of light intensity and photoperiod  
540 on the growth and lipid content of microalgae *Nannochloropsis* sp. *Bioresour Technol*  
541 129:7–11.
- 542 59. Piligaev A V., Sorokina KN, Shashkov M V., Parmon VN. 2018. Screening and  
543 comparative metabolic profiling of high lipid content microalgae strains for application in  
544 wastewater treatment. *Bioresour Technol* 250:538–547.
- 545 60. Caccavo F, Lonergan DJ, Lovley DR, Davis M, Stolz JF, McInerney MJ. 1994. *Geobacter*  
546 *sulfurreducens* sp. nov., a Hydrogen- and Acetate-Oxidizing Dissimilatory Metal-  
547 Reducing Microorganism. *Appl Environ Microbiol* 60:3752–3759.
- 548 61. Stöckl M, Teubner NC, Holtmann D, Mangold KM, Sand W. 2019. Extracellular  
549 Polymeric Substances from *Geobacter sulfurreducens* Biofilms in Microbial Fuel Cells.  
550 *ACS Appl Mater Interfaces* 11:8961–8968.
- 551 62. Davies SL, Whittenbury R. 1970. Fine structure of methane and other hydrocarbon-  
552 utilizing bacteria. *J Gen Microbiol* 61:227–232.
- 553 63. Murray RG, Watson SW. 1965. Structure of *Nitrosocystis Oceanus* and Comparison With  
554 *Nitrosomonas* and *Nitrobacter*. *J Bacteriol* 89:1594–1609.
- 555 64. Greening C, Lithgow T. 2020. Formation and function of bacterial organelles. *Nat Rev*  
556 *Microbiol* 18:677–689.
